# Supplementary material for: Neuropilin 1 and its inhibitory ligand mini-tryptophanyl-tRNA synthetase inversely regulate VE-cadherin turnover and vascular permeability
Source: PubMed Central journal article supplement (PMC9300702; doi:10.1038/s41467-022-31904-1), 2022-07-20
Supplement: 41467_2022_31904_MOESM3_ESM.pdf [file 41467_2022_31904_MOESM3_ESM.pdf]

## **Description of Additional Supplementary Files**

**File name: Supplementary Data 1**

**Description: MS proteomic data of NRP1 interactome.**

**File name: Supplementary Data 2**

**Description: KEGG pathway enrichment analysis performed with STRING.**

**File name: Supplementary Data 3**

**Description: Graph data of Supplementary Figure 3.**
